# Supplementary material
Source: PubMed Central journal article supplement (PMC5029084)
Supplement: NIHMS813033-supplement-Supplemental_Table_2.pdf [file NIHMS813033-supplement-Supplemental_Table_2.pdf]

Supplementary Table 2. NUDT15 variants identified in the Broad Institute Exome Aggregation Consortium (ExAC) database

| Chrom | Position | rsID        | Annotation        | Protein Consequence    | Alleles   |             | Transcript Consequence                                | All<br>(N=60,706) | Minor Allele Frequency (%) |                        |                          |                         |                           |
|-------|----------|-------------|-------------------|------------------------|-----------|-------------|-------------------------------------------------------|-------------------|----------------------------|------------------------|--------------------------|-------------------------|---------------------------|
|       |          |             |                   |                        | Reference | Alternative |                                                       |                   | Africans<br>(N=5,203)      | Hispanics<br>(N=5,789) | East Asians<br>(N=4,327) | Europeans<br>(N=36,677) | South Asians<br>(N=8,256) |
| 13    | 48619855 | rs116855232 | missense          | p.Arg139Cys            | R         | C           | c.415C>T                                              | 2.7854            | 0.0680                     | 7.1120                 | 10.4345                  | 0.6220                  | 7.0044                    |
| 13    | 48619118 | rs554405994 | inframe insertion | p.Val18_Val19insGlyVal | GV        | GVGV        | c.36_37msGGAGTC                                       | 1.2878            | 0.1675                     | 12.3050                | 6.9810                   | 0.5053                  | 0.1385                    |
| 13    | 48619856 | rs147390019 | missense          | p.Arg139His            | R         | H           | c.416G>A                                              | 0.1823            | 0.0389                     | 1.7453                 | 0.1387                   | 0.0027                  | 0.0                       |
| 13    | 48619394 | rs186364861 | missense          | p.Val18Ile             | V         | I           | c.52G>A                                               | 0.1461            | 0                          | 0                      | 1.5998                   | 0.0037                  | 0.0605                    |
| 13    | 48619118 | NA          | inframe deletion  | p.Val14_Gly15del       | VG        | del         | c.36_42delIAGGAGTCinsA                                | 0.1597            | 0.0478                     | 0                      | 0                        | 0.2575                  | 0.0746                    |
| 13    | 4861961  | rs777311140 | frameshift        | p.Cys28GlyfsTer28      | C         | NA          | c.79_80msGGCG                                         | 0.0677            | 0                          | 0                      | 0                        | 0.1064                  | 0.0                       |
| 13    | 48619117 | rs528005656 | missense          | p.Pro12Leu             | P         | L           | c.35C>T                                               | 0.0374            | 0                          | 0                      | 0                        | 0                       | 0.1500                    |
| 13    | 48615174 | rs529126695 | missense          | p.Val93Ile             | V         | I           | c.277G>A                                              | 0.0220            | 0                          | 0                      | 0                        | 0                       | 0.1613                    |
| 13    | 4861896  | rs761635179 | missense          | p.Ala5Val              | A         | V           | c.14C>T                                               | 0.0148            | 0                          | 0                      | 0                        | 0.0319                  | 0.0                       |
| 13    | 4861887  | rs749250312 | missense          | p.Thr2Met              | T         | M           | c.5C>T                                                | 0.0132            | 0                          | 0                      | 0                        | 0                       | 0.0360                    |
| 13    | 48612038 | rs149436418 | missense          | p.Phe52Leu             | F         | L           | c.156C>G                                              | 0.0112            | 0                          | 0                      | 0                        | 0.0178                  | 0.0                       |
| 13    | 4861919  | rs767290343 | missense          | p.Gly13Arg             | G         | R           | c.37G>A                                               | 0.0105            | 0                          | 0                      | 0                        | 0.0196                  | 0.0                       |
| 13    | 48615239 | rs761191455 | frameshift        | p.Glu115GlyfsTer4      | E         | NA          | c.342_343insG                                         | 0.0083            | 0                          | 0                      | 0.0533                   | 0                       | 0.0315                    |
| 13    | 48619907 | rs139551410 | missense          | p.Leu156Gln            | L         | Q           | c.467T>A                                              | 0.0083            | 0.0883                     | 0                      | 0                        | 0                       | 0.0061                    |
| 13    | 4861983  | rs766023281 | missense          | p.Arg34Thr             | R         | T           | c.101G>C                                              | 0.0083            | 0                          | 0                      | 0.1183                   | 0                       | 0.0                       |
| 13    | 4861896  | rs761635179 | missense          | p.Ala5Gly              | A         | G           | c.14C>G                                               | 0.0074            | 0                          | 0.2915                 | 0                        | 0                       | 0.0                       |
| 13    | 4861886  | rs780144127 | missense          | p.Thr2Ala              | T         | A           | c.A_27delACGGCCAGCCACGCCGGCGGinsCGGCGACCGCACCGCCGGCGG | 0.0045            | 0.0430                     | 0                      | 0                        | 0                       | 0.0                       |
| 13    | 4861981  | rs150241065 | missense          | p.Lys33Asn             | K         | N           | c.99G>C                                               | 0.0042            | 0.0435                     | 0                      | 0                        | 0                       | 0.0                       |
| 13    | 48619819 | rs746431481 | missense          | p.Glu127Lys            | E         | K           | c.379G>A                                              | 0.0041            | 0.0388                     | 0.0087                 | 0                        | 0                       | 0.0                       |
| 13    | 4861890  | rs768620317 | missense          | p.Ala3Gly              | A         | G           | c.8C>G                                                | 0.0041            | 0                          | 0                      | 0                        | 0                       | 0.0118                    |
| 13    | 4861898  | rs776779121 | missense          | p.Gln6Glu              | Q         | E           | c.16C>G                                               | 0.0036            | 0                          | 0                      | 0                        | 0                       | 0.0115                    |
| 13    | 48615145 | rs773719265 | missense          | p.Ser83Tyr             | S         | Y           | c.248C>A                                              | 0.0033            | 0                          | 0                      | 0.0116                   | 0                       | 0.0183                    |
| 13    | 48619110 | rs775629796 | missense          | p.Arg10Gly             | R         | G           | c.28C>G                                               | 0.0030            | 0                          | 0                      | 0                        | 0.0059                  | 0.0                       |
| 13    | 48619114 | NA          | missense          | p.Arg11Gln             | R         | Q           | c.32G>A                                               | 0.0028            | 0                          | 0                      | 0.0324                   | 0                       | 0.0                       |
| 13    | 4861920  | rs567318719 | missense          | p.Gly13Ala             | G         | A           | c.38G>C                                               | 0.0025            | 0.0236                     | 0                      | 0                        | 0                       | 0.0                       |
| 13    | 48615121 | rs763662698 | missense          | p.Val75Gly             | V         | G           | c.224T>G                                              | 0.0025            | 0.0096                     | 0                      | 0                        | 0.0027                  | 0.0                       |
| 13    | 48615240 | rs764525662 | frameshift        | p.Asn117LysfsTer2      | N         | NA          | c.343delGlnsGA                                        | 0.0024            | 0                          | 0                      | 0                        | 0.0020                  | 0.0079                    |
| 13    | 48612019 | NA          | missense          | p.Pro46Arg             | P         | R           | c.137C>G                                              | 0.0023            | 0                          | 0                      | 0                        | 0.0018                  | 0.0082                    |
| 13    | 4861929  | rs779488127 | missense          | p.Val16Asp             | V         | D           | c.47T>A                                               | 0.0022            | 0.0207                     | 0                      | 0                        | 0                       | 0.0                       |
| 13    | 48612040 | rs752181787 | missense          | p.Gly53Asp             | G         | D           | c.158G>A                                              | 0.0022            | 0.0242                     | 0                      | 0                        | 0                       | 0.0                       |
| 13    | 48612039 | rs199676691 | missense          | p.Gly53Arg             | G         | R           | c.157G>C                                              | 0.0022            | 0.0121                     | 0                      | 0                        | 0.0018                  | 0.0                       |
| 13    | 48612039 | rs199676691 | missense          | p.Gly53Ser             | G         | S           | c.157G>A                                              | 0.0022            | 0.0121                     | 0                      | 0                        | 0.0018                  | 0.0                       |
| 13    | 4861933  | rs768550630 | inframe deletion  | p.Val19_Val20del       | V         | _Va         | c.52_57delGTCGCTG                                     | 0.0021            | 0                          | 0                      | 0                        | 0.0038                  | 0.0                       |
| 13    | 4861954  | rs549709884 | missense          | p.Lys24Asn             | K         | N           | c.72G>T                                               | 0.0018            | 0                          | 0                      | 0                        | 0                       | 0.0096                    |
| 13    | 4861958  | rs561923692 | missense          | p.Pro26Ala             | P         | A           | c.76C>G                                               | 0.0017            | 0                          | 0                      | 0                        | 0.0028                  | 0.0                       |
| 13    | 4861959  | rs775476759 | missense          | p.Pro26Leu             | P         | L           | c.77C>T                                               | 0.0017            | 0                          | 0                      | 0                        | 0                       | 0.0095                    |
| 13    | 48615142 | rs767909886 | frameshift        | p.Phe84LeufsTer12      | F         | NA          | c.246_249delTICT                                      | 0.0017            | 0                          | 0                      | 0                        | 0.0027                  | 0.0                       |
| 13    | 48615108 | rs369972549 | missense          | p.His71Tyr             | H         | Y           | c.211C>T                                              | 0.0017            | 0                          | 0                      | 0                        | 0.0027                  | 0.0                       |
| 13    | 4861962  | rs763051893 | missense          | p.Arg27Leu             | R         | L           | c.80G>T                                               | 0.0016            | 0                          | 0                      | 0                        | 0                       | 0.0094                    |
| 13    | 4861966  | rs774895601 | missense          | p.Cys28Trp             | C         | W           | c.84C>G                                               | 0.0016            | 0                          | 0                      | 0.0216                   | 0                       | 0.0                       |
| 13    | 4861967  | rs762270086 | missense          | p.Val29Leu             | V         | L           | c.85G>C                                               | 0.0016            | 0                          | 0                      | 0.0214                   | 0                       | 0.0                       |
| 13    | 4861979  | rs768057637 | missense          | p.Lys33Glu             | K         | E           | c.97A>G                                               | 0.0014            | 0                          | 0                      | 0                        | 0.0022                  | 0.0                       |
| 13    | 48615249 | rs753865201 | frameshift        | p.Ser119ValfsTer23     | S         | NA          | c.352_353delGainsG                                    | 0.0014            | 0.0159                     | 0                      | 0                        | 0                       | 0.0                       |
| 13    | 4861988  | rs753319151 | missense          | p.Gly36Arg             | G         | R           | c.106G>C                                              | 0.0013            | 0                          | 0                      | 0                        | 0                       | 0.0089                    |
| 13    | 4861988  | rs753319151 | missense          | p.Gly36Cys             | G         | C           | c.106G>T                                              | 0.0013            | 0                          | 0.0273                 | 0                        | 0                       | 0.0                       |
| 13    | 4861992  | rs778722701 | missense          | p.Ser37Leu             | S         | L           | c.110C>T                                              | 0.0013            | 0                          | 0                      | 0                        | 0.0021                  | 0.0                       |
| 13    | 4861992  | rs778722701 | missense          | p.Ser37Trp             | S         | W           | c.110C>G                                              | 0.0013            | 0                          | 0                      | 0                        | 0.0021                  | 0.0                       |
| 13    | 48612004 | rs746780341 | missense          | p.Gly41Ala             | G         | A           | c.122C>G                                              | 0.0012            | 0                          | 0                      | 0                        | 0.0019                  | 0.0                       |
| 13    | 48615240 | rs79026553  | missense          | p.Glu115Gln            | E         | Q           | c.343G>C                                              | 0.0012            | 0                          | 0                      | 0                        | 0.0020                  | 0.0                       |
| 13    | 48612015 | rs775735812 | missense          | p.Leu45Phe             | L         | F           | c.133C>T                                              | 0.0012            | 0.0125                     | 0                      | 0                        | 0                       | 0.0                       |
| 13    | 48612024 | rs774287683 | missense          | p.Gly48Ser             | G         | S           | c.142G>A                                              | 0.0011            | 0                          | 0                      | 0                        | 0                       | 0.0081                    |
| 13    | 48612037 | rs761080311 | missense          | p.Phe52Tyr             | F         | Y           | c.155T>A                                              | 0.0011            | 0                          | 0                      | 0                        | 0.0018                  | 0.0                       |
| 13    | 48612030 | rs772679803 | missense          | p.Leu50Val             | L         | V           | c.148C>G                                              | 0.0011            | 0                          | 0                      | 0                        | 0.0018                  | 0.0                       |
| 13    | 48615201 | rs765568874 | missense          | p.Asp102Tyr            | D         | Y           | c.304G>T                                              | 0.0009            | 0.0102                     | 0                      | 0                        | 0                       | 0.0                       |
| 13    | 48615189 | rs755815170 | missense          | p.Lys98Glu             | K         | E           | c.292A>G                                              | 0.0009            | 0                          | 0                      | 0                        | 0                       | 0.0063                    |
| 13    | 48615187 | rs750263044 | missense          | p.Met97Thr             | M         | T           | c.290T>C                                              | 0.0009            | 0                          | 0                      | 0                        | 0.0014                  | 0.0                       |
| 13    | 48615067 | rs138667875 | missense          | p.Glu57Gly             | E         | G           | c.170A>G                                              | 0.0008            | 0                          | 0                      | 0                        | 0.0014                  | 0.0                       |
| 13    | 48615079 | rs777094247 | missense          | p.Gln61Pro             | Q         | P           | c.182A>C                                              | 0.0008            | 0                          | 0                      | 0                        | 0.0014                  | 0.0                       |
| 13    | 48619796 | rs751683170 | missense          | p.Ser119Asn            | S         | N           | c.356G>A                                              | 0.0008            | 0                          | 0                      | 0.0116                   | 0                       | 0.0                       |
| 13    | 48615151 | rs761856125 | missense          | p.Ile85Thr             | I         | T           | c.254T>C                                              | 0.0008            | 0                          | 0                      | 0.0116                   | 0                       | 0.0                       |
| 13    | 48615149 | rs753019895 | inframe deletion  | p.Ile85del             | I         | del         | c.253_255delATT                                       | 0.0008            | 0                          | 0                      | 0                        | 0.0014                  | 0.0                       |
| 13    | 48619921 | rs751671087 | missense          | p.Gly161Arg            | G         | R           | c.481G>A                                              | 0.0008            | 0                          | 0                      | 0.0116                   | 0                       | 0.0                       |
| 13    | 48619807 | rs78126752  | missense          | p.Val123Ile            | V         | I           | c.367G>A                                              | 0.0008            | 0                          | 0                      | 0                        | 0.0014                  | 0.0                       |
| 13    | 48619915 | rs142636030 | missense          | p.Tyr159Asn            | Y         | N           | c.475T>A                                              | 0.0008            | 0.0098                     | 0                      | 0                        | 0                       | 0.0                       |
| 13    | 48619909 | NA          | missense          | p.Val157Leu            | V         | L           | c.469G>T                                              | 0.0008            | 0                          | 0                      | 0                        | 0.0014                  | 0.0                       |
| 13    | 48615103 | rs769463678 | missense          | p.Ala69Val             | A         | V           | c.206T>C                                              | 0.0008            | 0                          | 0.0086                 | 0                        | 0                       | 0.0                       |
| 13    | 48619821 | rs756603433 | missense          | p.Glu127Asp            | E         | D           | c.381A>C                                              | 0.0008            | 0                          | 0                      | 0                        | 0                       | 0.0061                    |
| 13    | 48619823 | rs749618301 | missense          | p.Leu128Pro            | L         | P           | c.383T>C                                              | 0.0008            | 0                          | 0.0087                 | 0                        | 0                       | 0.0                       |
| 13    | 48619826 | rs768324690 | missense          | p.Pro129Arg            | P         | R           | c.386C>G                                              | 0.0008            | 0                          | 0                      | 0                        | 0.0014                  | 0.0                       |
| 13    | 48619871 | rs772773911 | missense          | p.Gln144Arg            | Q         | R           | c.431A>G                                              | 0.0008            | 0                          | 0                      | 0                        | 0.0014                  | 0.0                       |
| 13    | 48619870 | rs773703261 | frameshift        | p.Gln144LeufsTer4      | Q         | NA          | c.430_431insT                                         | 0.0008            | 0.0097                     | 0                      | 0                        | 0                       | 0.0                       |
| 13    | 48619835 | rs769861583 | frameshift        | p.Gln133SerfsTer9      | Q         | NA          | c.396delC                                             | 0.0008            | 0                          | 0                      | 0                        | 0                       | 0.0061                    |
| 13    | 48619848 | rs778377158 | missense          | p.Trp136Cys            | W         | C           | c.408G>C                                              | 0.0008            | 0                          | 0                      | 0                        | 0.0014                  | 0.0                       |

Red denotes variants identified in the ALL patient cohorts.
